# Supplementary material for: Impaired branched-chain amino acid (BCAA) catabolism during adipocyte differentiation decreases glycolytic flux
Source: PubMed Central journal article supplement (PMC11667163; doi:10.1016/j.jbc.2024.108004), 2024-11-16
Supplement: mmc1.pdf [file mmc1.pdf]

**Supplementary Table 1:** GC-MS metabolite fragment ions. Metabolites used in sgControl v. sgBckdha MFA model:

Metabolite fragment ions used for GC-MS analysis:

| <b>Metabolite</b>  | <b>Carbons</b> | <b>Formula</b>                                                                | <b>Mass (m/z)</b> |
|--------------------|----------------|-------------------------------------------------------------------------------|-------------------|
| Pyruvate           | 123            | C <sub>6</sub> H <sub>12</sub> O <sub>3</sub> NSi                             | 174               |
| aKG                | 12345          | C <sub>14</sub> H <sub>28</sub> O <sub>5</sub> NSi <sub>2</sub>               | 346               |
| Fumarate           | 1234           | C <sub>12</sub> H <sub>23</sub> O <sub>4</sub> Si <sub>2</sub>                | 287               |
| Malate             | 1234           | C <sub>18</sub> H <sub>39</sub> O <sub>5</sub> Si <sub>3</sub>                | 419               |
| Glutamate          | 12345          | C <sub>19</sub> H <sub>42</sub> O <sub>4</sub> NSi <sub>3</sub>               | 432               |
| Glutamine          | 12345          | C <sub>19</sub> H <sub>43</sub> O <sub>3</sub> N <sub>2</sub> Si <sub>3</sub> | 431               |
| Citrate            | 123456         | C <sub>20</sub> H <sub>39</sub> O <sub>6</sub> Si <sub>3</sub>                | 459               |
| Palmitate          | 1-16           | C <sub>17</sub> H <sub>34</sub> O <sub>2</sub>                                | 270               |
| Pentadecanoic Acid | 1-15           | C <sub>16</sub> H <sub>32</sub> O <sub>2</sub>                                | 256               |
| Heptadecanoic Acid | 1-17           | C <sub>18</sub> H <sub>36</sub> O <sub>2</sub>                                | 284               |
| Leucine            | 23456          | C <sub>13</sub> H <sub>32</sub> O <sub>1</sub> N <sub>1</sub> Si <sub>2</sub> | 274               |
| Ketoisocaproate    | 123456         | C <sub>9</sub> H <sub>18</sub> O <sub>3</sub> N <sub>1</sub> Si <sub>1</sub>  | 216               |
| Valine             | 12345          | C <sub>13</sub> H <sub>30</sub> O <sub>2</sub> N <sub>1</sub> Si <sub>2</sub> | 288               |

**Supplementary Table 2.** MFA of 3T3-L1 sgControl. Full results of the <sup>13</sup>C-MFA model.

| 3T3-L1 sgControl<br>Pathway/Reaction | Flux<br>(nanomoles/well/hr) | 95% Confidence Interval |             |
|--------------------------------------|-----------------------------|-------------------------|-------------|
|                                      |                             | Lower Bound             | Upper Bound |
| <b>Glycolysis</b>                    |                             |                         |             |
| Glc.x -> G6P                         | 188.03                      | 184.41                  | 191.68      |
| G6P <-> F6P                          | 187.43                      | 183.81                  | 191.08      |
| G6P <-> F6P                          | 94.24                       | 0.00                    | Inf         |
| F6P -> DHAP + GAP                    | 187.83                      | 184.21                  | 191.48      |
| DHAP <-> GAP                         | 187.83                      | 184.21                  | 191.48      |
| DHAP <-> GAP                         | 0.00                        | 0.00                    | Inf         |
| GAP <-> 3PG                          | 375.86                      | 368.62                  | 383.17      |
| GAP <-> 3PG                          | 86.70                       | 0.00                    | Inf         |
| 3PG -> PEP                           | 375.86                      | 368.62                  | 383.17      |
| PEP -> Pyr.c                         | 375.86                      | 368.62                  | 383.17      |
| Pyr.c <-> Lac                        | 264.19                      | 254.49                  | 273.68      |
| Pyr.c <-> Lac                        | 2.86                        | 0.00                    | Inf         |
| Lac -> Lac.x                         | 264.19                      | 254.49                  | 273.68      |
| Pyr.c -> Ala                         | 13.97                       | 8.98                    | 15.58       |
| Pyr.m -> Ala                         | 0.00                        | 0.00                    | 4.88        |
| Ala -> Ala.x                         | 13.97                       | 12.35                   | 15.58       |
| <b>Pentose Phosphate Pathway</b>     |                             |                         |             |
| G6P -> P5P + CO2                     | 0.60                        | 0.57                    | 0.60        |
| P5P + P5P <-> S7P + GAP              | 0.20                        | 0.19                    | 0.20        |
| P5P + P5P <-> S7P + GAP              | 0.00                        | 0.00                    | NaN         |
| S7P + GAP <-> F6P + E4P              | 0.20                        | 0.19                    | 0.20        |
| S7P + GAP <-> F6P + E4P              | 0.00                        | 0.00                    | Inf         |
| P5P + E4P <-> F6P + GAP              | 0.20                        | 0.19                    | 0.20        |
| P5P + E4P <-> F6P + GAP              | 0.00                        | 0.00                    | Inf         |
| <b>Anaplerotic Reactions</b>         |                             |                         |             |
| Pyr.c -> Pyr.m                       | 97.71                       | 86.04                   | 109.92      |
| Pyr.m + CO2 -> Oac.m                 | 58.99                       | 51.32                   | 67.54       |
| Oac.c -> PEP + CO2                   | 0.00                        | 0.00                    | 2.71        |
| Mal.m -> Pyr.m + CO2                 | 66.51                       | 58.13                   | 75.78       |
| Mal.c -> Pyr.c + CO2                 | 0.00                        | 0.00                    | 2.67        |
| PropCoA + CO2 -> SucCoA              | 1.66                        | 0.95                    | 2.45        |
| Gln.c <-> Glu.c                      | 6.29                        | 2.17                    | 6.29        |
| Gln.c <-> Glu.c                      | 0.00                        | 0.00                    | 4.12        |
| Glu.c -> Glu.x                       | 0.27                        | 0.20                    | 0.34        |
| Glu.c <-> Glu.m                      | -11.06                      | -16.15                  | -8.09       |

|                       |          |        |        |
|-----------------------|----------|--------|--------|
| Glu.c <-> Glu.m       | 0.00     | 0.00   | 4.12   |
| Glu.m <-> Akg.m       | -11.22   | -12.85 | -8.32  |
| Glu.m <-> Akg.m       | 0.00     | 0.00   | 5.15   |
| Akg.c <-> Glu.c       | -17.08   | -19.00 | -14.11 |
| Akg.c <-> Glu.c       | 1240.00  | 0.00   | Inf    |
| Akg.m <-> Akg.c       | 0.00     | -2.17  | 0.90   |
| Akg.m <-> Akg.c       | 0.00     | 0.00   | 0.90   |
| Akg.c + CO2 <-> Cit.c | 17.08    | 14.12  | 18.90  |
| Akg.c + CO2 <-> Cit.c | 0.00     | 0.00   | 1.04   |
| Glu.m <-> Gln.m       | 0.16     | -3.97  | 0.62   |
| Glu.m <-> Gln.m       | 14.44    | 12.05  | 17.57  |
| Gln.x -> Gln.e        | 6.13     | 5.67   | 6.59   |
| Gln.e -> Gln.c        | 38.92    | 38.42  | 39.42  |
| Gln.c -> Gln.e        | 32.79    | 32.52  | 33.05  |
| Gln.m <-> Gln.c       | 0.16     | -3.97  | 0.62   |
| Gln.m <-> Gln.c       | 54900.00 | 11.98  | Inf    |

#### TCA Cycle

---

|                          |         |          |         |
|--------------------------|---------|----------|---------|
| Pyr.m -> AcCoA.m + CO2   | 105.22  | 92.85    | 118.16  |
| AcCoAOther -> AcCoA.m    | 18.48   | 14.99    | 22.35   |
| AcCoA.m + Oac.m -> Cit.m | 140.10  | 122.65   | 158.49  |
| Cit.m <-> Akg.m + CO2    | 31.20   | 27.33    | 35.10   |
| Cit.m <-> Akg.m + CO2    | 0.00    | 0.00     | 0.79    |
| Akg.m -> SucCoA + CO2    | 19.97   | 17.06    | 23.28   |
| SucCoA -> Suc            | 21.63   | 18.25    | 25.45   |
| Suc <-> Fum.m            | 21.63   | 18.25    | 25.45   |
| Suc <-> Fum.m            | 0.00    | 0.00     | Inf     |
| Fum.m <-> Mal.m          | 21.63   | 18.25    | 25.45   |
| Fum.m <-> Mal.m          | 553.87  | 0.00     | Inf     |
| Mal.m <-> Oac.m          | 653.51  | -1260.00 | 1440.00 |
| Mal.m <-> Oac.m          | 0.00    | 0.00     | 2010.00 |
| Oac.m <-> Asp.m          | 572.40  | -1440.00 | 1360.00 |
| Oac.m <-> Asp.m          | 398.54  | 0.00     | Inf     |
| Mal.c <-> Oac.c          | 130.53  | -1400.00 | Inf     |
| Mal.c <-> Oac.c          | 0.00    | 0.00     | Inf     |
| Oac.c <-> Asp.c          | 256.52  | -1360.00 | Inf     |
| Oac.c <-> Asp.c          | 533.54  | 0.00     | Inf     |
| Asp.c -> Fum.c           | 828.92  | 0.00     | Inf     |
| Mal.c <-> Fum.c          | -828.92 | -Inf     | 0.00    |
| Mal.c <-> Fum.c          | 1580.00 | 0.00     | Inf     |
| Mal.c <-> Mal.m          | 698.39  | -1210.00 | 1390.00 |

|                                                                                               |          |          |            |
|-----------------------------------------------------------------------------------------------|----------|----------|------------|
| Mal.c <-> Mal.m                                                                               | 86100.00 | 0.00     | Inf        |
| Asp.m <-> Asp.c                                                                               | 572.40   | -1440.00 | 1360.00    |
| Asp.m <-> Asp.c                                                                               | 0.00     | 0.00     | Inf        |
| <b>BCAA Catabolism</b>                                                                        |          |          |            |
| Leu.x -> Leu                                                                                  | 9.37     | 9.05     | 9.69       |
| Leu <-> KIC                                                                                   | 5.47     | 4.71     | 6.29       |
| Leu <-> KIC                                                                                   | 0.34     | 0.00     | Inf        |
| KIC <-> IsoVCoA + CO2                                                                         | 5.47     | 4.71     | 6.29       |
| KIC <-> IsoVCoA + CO2                                                                         | 0.17     | 0.07     | 0.65       |
| IsoVCoA + CO2 <-> HMGC0A                                                                      | 5.47     | 4.71     | 6.29       |
| IsoVCoA + CO2 <-> HMGC0A                                                                      | 0.17     | 0.00     | 1500000.00 |
| HMGC0A -> AcCoA.m + AcCoA.m<br>+ AcCoA.m                                                      | 5.47     | 4.71     | 6.29       |
| LeuT -> Leu                                                                                   | 3.93     | 3.74     | 4.13       |
| Leu -> LeuP                                                                                   | 7.84     | 6.90     | 8.73       |
| Val.x -> Val                                                                                  | 5.85     | 4.96     | 6.74       |
| ValT -> Val                                                                                   | 1.51     | 1.26     | 1.77       |
| Val -> ValP                                                                                   | 0.00     | 0.00     | 2.57       |
| Val <-> IsoBCoA + CO2                                                                         | 7.36     | 5.16     | 8.48       |
| Val <-> IsoBCoA + CO2                                                                         | 0.54     | 0.38     | 0.72       |
| IsoBCoA <-> MMA                                                                               | 7.35     | 4.89     | 8.48       |
| IsoBCoA <-> MMA                                                                               | 0.00     | 0.00     | Inf        |
| MMA -> PropCoA + CO2                                                                          | 7.35     | 4.89     | 8.48       |
| <b>Fatty Acid Synthesis</b>                                                                   |          |          |            |
| Cit.m -> Cit.c                                                                                | 108.91   | 93.79    | 125.05     |
| Cit.c -> AcCoA.c + Oac.c                                                                      | 125.99   | 110.17   | 142.64     |
| AcCoA.c + AcCoA.c + AcCoA.c +<br>AcCoA.c + AcCoA.c + AcCoA.c +<br>AcCoA.c + AcCoA.c -> Palm.s | 10.62    | 7.97     | 17.15      |
| Palm.s -> Palm                                                                                | 10.62    | 7.97     | 17.15      |
| Palm.d -> Palm                                                                                | 7.36     | 5.47     | 12.08      |
| PropCoA + AcCoA.c + AcCoA.c +<br>AcCoA.c + AcCoA.c + AcCoA.c +<br>AcCoA.c -> C15FA.s          | 5.69     | 1.48     | 7.04       |
| C15FA.s -> C15FA                                                                              | 5.69     | 1.48     | 7.04       |
| C15FA.d -> C15FA                                                                              | 1.16     | 0.00     | 1.56       |
| C15FA + AcCoA.c -> C17FA.s                                                                    | 6.85     | 1.01     | 8.49       |
| C17FA.s -> C17FA                                                                              | 6.85     | 1.01     | 8.49       |
| C17FA.d -> C17FA                                                                              | 2.22     | 0.00     | 2.82       |

|                                                                                       |      |      |      |
|---------------------------------------------------------------------------------------|------|------|------|
| IsoBCoA + AcCoA.c + AcCoA.c +<br>AcCoA.c + AcCoA.c + AcCoA.c +<br>AcCoA.c -> IsoC16.s | 0.01 | 0.00 | 2.51 |
| IsoC16.s -> IsoC16                                                                    | 0.01 | 0.00 | 2.51 |
| IsoC16.d -> IsoC16                                                                    | 0.00 | 0.00 | 1.46 |
| <b>Dilution/Mixing</b>                                                                |      |      |      |
| 0*Pyr.c -> Pyr.mnt                                                                    | 0.00 | 0.00 | 0.01 |
| 0*Pyr.m -> Pyr.mnt                                                                    | 1.00 | 0.99 | 1.00 |
| 0*Mal.c -> Mal.mnt                                                                    | 0.00 | 0.00 | 1.00 |
| 0*Mal.m -> Mal.mnt                                                                    | 1.00 | 0.00 | 1.00 |
| 0*Asp.c -> Asp.mnt                                                                    | 0.98 | 0.00 | 1.00 |
| 0*Asp.m -> Asp.mnt                                                                    | 0.02 | 0.00 | 1.00 |
| 0*Fum.m -> Fum.mnt                                                                    | 0.99 | 0.00 | 1.00 |
| 0*Fum.c -> Fum.mnt                                                                    | 0.01 | 0.00 | 1.00 |
| 0*Cit.m -> Cit.mnt                                                                    | 0.76 | 0.53 | 0.97 |
| 0*Cit.c -> Cit.mnt                                                                    | 0.24 | 0.03 | 0.47 |
| 0*Glu.m -> Glu.mnt                                                                    | 1.00 | 0.74 | 1.00 |
| 0*Glu.c -> Glu.mnt                                                                    | 0.00 | 0.00 | 0.26 |
| 0*Gln.m -> Gln.mnt                                                                    | 0.00 | 0.00 | 1.00 |
| 0*Gln.c -> Gln.mnt                                                                    | 1.00 | 0.00 | 1.00 |
| 0*Akg.m -> Akg.mnt                                                                    | 0.46 | 0.41 | 0.55 |
| 0*Akg.c -> Akg.mnt                                                                    | 0.54 | 0.45 | 0.59 |
| Pyr.mnt -> Pyr.fix                                                                    | 1.00 | 1.00 | 1.00 |
| Asp.mnt -> Asp.fix                                                                    | 1.00 | 1.00 | 1.00 |
| Mal.mnt -> Mal.fix                                                                    | 1.00 | 1.00 | 1.00 |
| Fum.mnt -> Fum.fix                                                                    | 1.00 | 1.00 | 1.00 |
| Cit.mnt -> Cit.fix                                                                    | 1.00 | 1.00 | 1.00 |
| Akg.mnt -> Akg.fix                                                                    | 1.00 | 1.00 | 1.00 |
| Glu.mnt -> Glu.fix                                                                    | 1.00 | 1.00 | 1.00 |
| Gln.mnt -> Gln.fix                                                                    | 1.00 | 1.00 | 1.00 |
| SSR                                                                                   | 774  | 637  | 785  |

**Supplementary Table 3.** MFA of 3T3-L1 sgBckdha. Full results of the <sup>13</sup>C-MFA model.

| 3T3-L1 sgBCKDHa<br>Pathway/Reaction | Flux<br>(nanomoles/well/hr) | 95% Confidence Interval |             |
|-------------------------------------|-----------------------------|-------------------------|-------------|
|                                     |                             | Lower Bound             | Upper Bound |
| <b>Glycolysis</b>                   |                             |                         |             |
| Glc.x -> G6P                        | 146.44                      | 142.50                  | 150.42      |
| G6P <-> F6P                         | 145.96                      | 142.02                  | 149.94      |
| G6P <-> F6P                         | 338.25                      | 0.00                    | Inf         |
| F6P -> DHAP + GAP                   | 146.28                      | 142.34                  | 150.26      |
| DHAP <-> GAP                        | 146.28                      | 142.34                  | 150.26      |
| DHAP <-> GAP                        | 0.00                        | 0.00                    | Inf         |
| GAP <-> 3PG                         | 292.73                      | 284.84                  | 300.67      |
| GAP <-> 3PG                         | 655.91                      | 0.00                    | Inf         |
| 3PG -> PEP                          | 292.73                      | 284.84                  | 300.67      |
| PEP -> Pyr.c                        | 292.73                      | 284.84                  | 300.80      |
| Pyr.c <-> Lac                       | 139.59                      | 129.18                  | 149.83      |
| Pyr.c <-> Lac                       | 502.56                      | 0.00                    | Inf         |
| Lac -> Lac.x                        | 139.59                      | 129.18                  | 149.83      |
| Pyr.c -> Ala                        | 6.54                        | 0.76                    | 7.64        |
| Pyr.m -> Ala                        | 0.00                        | 0.00                    | 5.73        |
| Ala -> Ala.x                        | 6.54                        | 5.43                    | 7.65        |
| <b>Pentose Phosphate Pathway</b>    |                             |                         |             |
| G6P -> P5P + CO2                    | 0.48                        | 0.42                    | 0.48        |
| P5P + P5P <-> S7P + GAP             | 0.16                        | 0.14                    | 0.16        |
| P5P + P5P <-> S7P + GAP             | 0.00                        | 0.00                    | NaN         |
| S7P + GAP <-> F6P + E4P             | 0.16                        | 0.14                    | 0.16        |
| S7P + GAP <-> F6P + E4P             | 0.00                        | 0.00                    | NaN         |
| P5P + E4P <-> F6P + GAP             | 0.16                        | 0.14                    | 0.16        |
| P5P + E4P <-> F6P + GAP             | 0.00                        | 0.00                    | Inf         |
| <b>Anaplerotic Reactions</b>        |                             |                         |             |
| Pyr.c -> Pyr.m                      | 146.60                      | 134.52                  | 159.13      |
| Pyr.m + CO2 -> Oac.m                | 84.28                       | 73.05                   | 95.51       |
| Oac.c -> PEP + CO2                  | 0.00                        | 0.00                    | 5.18        |
| Mal.m -> Pyr.m + CO2                | 98.22                       | 88.30                   | 110.01      |
| Mal.c -> Pyr.c + CO2                | 0.00                        | 0.00                    | 4.62        |
| PropCoA + CO2 -> SucCoA             | 1.33                        | 0.46                    | 2.27        |
| Gln.c <-> Glu.c                     | 6.29                        | -2.72                   | 6.29        |
| Gln.c <-> Glu.c                     | 0.00                        | 0.00                    | 9.01        |
| Glu.c -> Glu.x                      | 0.18                        | 0.17                    | 0.19        |
| Glu.c <-> Glu.m                     | -18.00                      | -28.50                  | -11.68      |

|                       |          |        |        |
|-----------------------|----------|--------|--------|
| Glu.c <-> Glu.m       | 0.00     | 0.00   | 9.01   |
| Glu.m <-> Akg.m       | -11.51   | -21.98 | -5.22  |
| Glu.m <-> Akg.m       | 42.62    | 22.21  | 74.63  |
| Akg.c <-> Glu.c       | -24.11   | -34.61 | -17.79 |
| Akg.c <-> Glu.c       | 11000.00 | 0.00   | Inf    |
| Akg.m <-> Akg.c       | 0.00     | -9.01  | 2.36   |
| Akg.m <-> Akg.c       | 0.00     | 0.00   | 9.01   |
| Akg.c + CO2 <-> Cit.c | 24.11    | 17.80  | 30.85  |
| Akg.c + CO2 <-> Cit.c | 0.00     | 0.00   | 1.47   |
| Glu.m <-> Gln.m       | -6.49    | -15.52 | -5.77  |
| Glu.m <-> Gln.m       | 34.95    | 27.18  | 42.57  |
| Gln.x -> Gln.e        | 12.78    | 12.06  | 13.50  |
| Gln.e -> Gln.c        | 42.74    | 41.97  | 43.52  |
| Gln.c -> Gln.e        | 29.96    | 29.58  | 30.35  |
| Gln.m <-> Gln.c       | -6.49    | -15.52 | -5.77  |
| Gln.m <-> Gln.c       | 72000.00 | 27.18  | Inf    |

### TCA Cycle

---

|                          |         |           |          |
|--------------------------|---------|-----------|----------|
| Pyr.m -> AcCoA.m + CO2   | 160.53  | 147.75    | 173.78   |
| AcCoAOther -> AcCoA.m    | 19.29   | 15.58     | 23.24    |
| AcCoA.m + Oac.m -> Cit.m | 186.06  | 170.15    | 202.61   |
| Cit.m <-> Akg.m + CO2    | 55.55   | 48.94     | 62.80    |
| Cit.m <-> Akg.m + CO2    | 0.00    | 0.00      | 2.38     |
| Akg.m -> SucCoA + CO2    | 44.04   | 39.60     | 48.97    |
| SucCoA -> Suc            | 45.37   | 40.55     | 50.72    |
| Suc <-> Fum.m            | 45.37   | 40.55     | 50.72    |
| Suc <-> Fum.m            | 0.01    | 0.00      | Inf      |
| Fum.m <-> Mal.m          | 45.37   | 40.55     | 50.72    |
| Fum.m <-> Mal.m          | 83.23   | 0.00      | Inf      |
| Mal.m <-> Oac.m          | 101.78  | -30700.00 | 1080.00  |
| Mal.m <-> Oac.m          | 1440.00 | 0.00      | Inf      |
| Oac.m <-> Asp.m          | 0.00    | -31300.00 | 940.84   |
| Oac.m <-> Asp.m          | 0.00    | 0.00      | Inf      |
| Mal.c <-> Oac.c          | 0.00    | -31600.00 | Inf      |
| Mal.c <-> Oac.c          | 0.00    | 0.00      | Inf      |
| Oac.c <-> Asp.c          | 154.62  | -31200.00 | Inf      |
| Oac.c <-> Asp.c          | 51.29   | 0.00      | Inf      |
| Asp.c -> Fum.c           | 154.62  | 0.00      | Inf      |
| Mal.c <-> Fum.c          | -154.62 | -Inf      | 0.00     |
| Mal.c <-> Fum.c          | 4790.00 | 0.00      | NaN      |
| Mal.c <-> Mal.m          | 154.62  | -31100.00 | 30500.00 |

|                                                                                               |        |           |           |
|-----------------------------------------------------------------------------------------------|--------|-----------|-----------|
| Mal.c <-> Mal.m                                                                               | 811.72 | 0.00      | Inf       |
| Asp.m <-> Asp.c                                                                               | 0.00   | -31300.00 | 940.84    |
| Asp.m <-> Asp.c                                                                               | 0.00   | 0.00      | Inf       |
| <b>BCAA Catabolism</b>                                                                        |        |           |           |
| Leu.x -> Leu                                                                                  | 5.63   | 5.15      | 6.11      |
| Leu <-> KIC                                                                                   | 2.08   | 1.54      | 2.65      |
| Leu <-> KIC                                                                                   | 2.33   | 0.00      | Inf       |
| KIC <-> IsoVCoA + CO2                                                                         | 2.08   | 1.54      | 2.65      |
| KIC <-> IsoVCoA + CO2                                                                         | 0.05   | 0.00      | 0.23      |
| IsoVCoA + CO2 <-> HMGC0A                                                                      | 2.08   | 1.54      | 2.65      |
| IsoVCoA + CO2 <-> HMGC0A                                                                      | 1.34   | 0.00      | 920000.00 |
| HMGC0A -> AcCoA.m + AcCoA.m<br>+ AcCoA.m                                                      | 2.08   | 1.54      | 2.65      |
| LeuT -> Leu                                                                                   | 1.37   | 1.24      | 1.52      |
| Leu -> LeuP                                                                                   | 4.93   | 4.10      | 5.73      |
| Val.x -> Val                                                                                  | 3.33   | 2.86      | 3.79      |
| ValT -> Val                                                                                   | 0.69   | 0.58      | 0.81      |
| Val -> ValP                                                                                   | 0.00   | 0.00      | 3.17      |
| Val <-> IsoBCoA + CO2                                                                         | 4.02   | 2.67      | 4.58      |
| Val <-> IsoBCoA + CO2                                                                         | 0.30   | 0.21      | 0.39      |
| IsoBCoA <-> MMA                                                                               | 4.01   | 1.00      | 4.58      |
| IsoBCoA <-> MMA                                                                               | 0.00   | 0.00      | Inf       |
| MMA -> PropCoA + CO2                                                                          | 4.01   | 1.00      | 4.58      |
| <b>Fatty Acid Synthesis</b>                                                                   |        |           |           |
| Cit.m -> Cit.c                                                                                | 130.51 | 115.67    | 145.95    |
| Cit.c -> AcCoA.c + Oac.c                                                                      | 154.62 | 140.14    | 169.69    |
| AcCoA.c + AcCoA.c + AcCoA.c +<br>AcCoA.c + AcCoA.c + AcCoA.c +<br>AcCoA.c + AcCoA.c -> Palm.s | 16.85  | 14.52     | 20.99     |
| Palm.s -> Palm                                                                                | 16.85  | 14.52     | 20.99     |
| Palm.d -> Palm                                                                                | 7.31   | 6.24      | 8.97      |
| PropCoA + AcCoA.c + AcCoA.c +<br>AcCoA.c + AcCoA.c + AcCoA.c +<br>AcCoA.c -> C15FA.s          | 2.68   | 0.00      | 3.73      |
| C15FA.s -> C15FA                                                                              | 2.68   | 0.00      | 3.73      |
| C15FA.d -> C15FA                                                                              | 1.04   | 0.00      | 1.64      |
| C15FA + AcCoA.c -> C17FA.s                                                                    | 3.73   | 1.20      | 5.25      |
| C17FA.s -> C17FA                                                                              | 3.73   | 1.20      | 5.25      |
| C17FA.d -> C17FA                                                                              | 4.11   | 1.03      | 6.00      |

|                                                                                       |      |      |      |
|---------------------------------------------------------------------------------------|------|------|------|
| IsoBCoA + AcCoA.c + AcCoA.c +<br>AcCoA.c + AcCoA.c + AcCoA.c +<br>AcCoA.c -> IsoC16.s | 0.00 | 0.00 | 3.17 |
| IsoC16.s -> IsoC16                                                                    | 0.00 | 0.00 | 3.17 |
| IsoC16.d -> IsoC16                                                                    | 0.00 | 0.00 | Inf  |
| <b>Dilution/Mixing</b>                                                                |      |      |      |
| 0*Pyr.c -> Pyr.mnt                                                                    | 0.00 | 0.00 | 0.02 |
| 0*Pyr.m -> Pyr.mnt                                                                    | 1.00 | 0.98 | 1.00 |
| 0*Mal.c -> Mal.mnt                                                                    | 0.00 | 0.00 | 1.00 |
| 0*Mal.m -> Mal.mnt                                                                    | 1.00 | 0.00 | 1.00 |
| 0*Asp.c -> Asp.mnt                                                                    | 0.90 | 0.00 | 1.00 |
| 0*Asp.m -> Asp.mnt                                                                    | 0.10 | 0.00 | 1.00 |
| 0*Fum.m -> Fum.mnt                                                                    | 0.03 | 0.00 | 1.00 |
| 0*Fum.c -> Fum.mnt                                                                    | 0.97 | 0.00 | 1.00 |
| 0*Cit.m -> Cit.mnt                                                                    | 0.57 | 0.33 | 0.75 |
| 0*Cit.c -> Cit.mnt                                                                    | 0.43 | 0.25 | 0.67 |
| 0*Glu.m -> Glu.mnt                                                                    | 1.00 | 0.67 | 1.00 |
| 0*Glu.c -> Glu.mnt                                                                    | 0.00 | 0.00 | 0.33 |
| 0*Gln.m -> Gln.mnt                                                                    | 0.00 | 0.00 | 1.00 |
| 0*Gln.c -> Gln.mnt                                                                    | 1.00 | 0.00 | 1.00 |
| 0*Akg.m -> Akg.mnt                                                                    | 0.63 | 0.48 | 0.81 |
| 0*Akg.c -> Akg.mnt                                                                    | 0.37 | 0.19 | 0.52 |
| Pyr.mnt -> Pyr.fix                                                                    | 1.00 | 1.00 | 1.00 |
| Asp.mnt -> Asp.fix                                                                    | 1.00 | 1.00 | 1.00 |
| Mal.mnt -> Mal.fix                                                                    | 1.00 | 1.00 | 1.00 |
| Fum.mnt -> Fum.fix                                                                    | 1.00 | 1.00 | 1.00 |
| Cit.mnt -> Cit.fix                                                                    | 1.00 | 1.00 | 1.00 |
| Akg.mnt -> Akg.fix                                                                    | 1.00 | 1.00 | 1.00 |
| Glu.mnt -> Glu.fix                                                                    | 1.00 | 1.00 | 1.00 |
| Gln.mnt -> Gln.fix                                                                    | 1.00 | 1.00 | 1.00 |
| SSR                                                                                   | 617  | 580  | 721  |

**Supplementary Table 4. CRISPR/Cas9 target sequences.** Sense and anti-sense single-guide sequences of Control, Bckdha, and Acad8 guides used in pooled cell culture experiments

| <b>Guide Target</b> | <b>Sense</b>              | <b>Anti-sense</b>         |
|---------------------|---------------------------|---------------------------|
| Control guide       | CACCGGCCGTGTTGCTGGATACGCC | AAACGGCGTATCCAGCAACACGGCC |
| Bckdha guide 1      | CACCGCAGCGAAATTGAAACCGGCG | AAACCGCCGGTTTCAATTTGCTGC  |
| Bckdha guide 2      | CACCGTGAGGGATCTGCGTGGCCAG | AAACCTGGCCACGCAGATCCCTCAC |
| Bckdha guide 3      | CACCGCATGACCAACTATGGCGAGG | AAACCCTCGCCATAGTTGGTCATGC |
| Acad8 guide 1       | CACCGCCTTCCGCATCACATCCACA | AAACTGTGGATGTGATGCGGAAGGC |
| Acad8 guide 2       | CACCGGCCAACAGGATTGGGACCG  | AAACCGGTCCCAATCCTGTTGGCC  |
| Acad8 guide 3       | CACCGAGGTGAGTCAGACATCTATG | AAACCATAGATGTCTGACTCACCTC |

**Supplementary Table 5. Primer sequences.** Forward and reverse sequences of primers used to quantify expression of genes using quantitative RT-qPCR.

| <b>Gene name</b>                                                                       | <b>Forward Sequence</b> | <b>Reverse Sequence</b> |
|----------------------------------------------------------------------------------------|-------------------------|-------------------------|
| 18S rRNA                                                                               | AGTCCCTGCCCTTTGTACACA   | CGATCCGAGGGCCTCACTA     |
| Adiponectin ( <i>AdipoQ</i> )                                                          | GACACCAAAGGGCTCAGGA     | GCCCTTCAGCTCCTGTCATT    |
| Carbohydrate response element binding protein ( <i>Chrebp</i> )                        | CACTCAGGGAATACACGCCTAC  | ATCTTGGTCTTAGGGTCTTCA   |
| Fatty acid binding protein 4 ( <i>Fabp4</i> )                                          | AGAAGTGGGAGTGGGCTTTG    | CCAGCTTGTACCATCTCGT     |
| Glucose transporter type 4 ( <i>Glut4</i> )                                            | AGCCTCTGATCATCGCAGTG    | ACTAAGAGCACCGAGACCAAC   |
| Peroxisome Proliferator-Activated Receptor Gamma Coactivator 1-Alpha ( <i>Pgc1a</i> )  | CCCTGCCATTGTTAAGACC     | TGCTGCTGTTCCCTGTTTTTC   |
| Peroxisome proliferator-activated receptor $\gamma$ ( <i>PPAR<math>\gamma</math></i> ) | TTCGCTGATGCACTGCCTAT    | ACAGACTCGGCACTCAATGG    |

**Supplementary Table 6.** Primer sequences used for human adipocytes.

| <b>Gene name</b> | <b>Forward Sequence</b> | <b>Reverse Sequence</b> |
|------------------|-------------------------|-------------------------|
| BCKDHA           | GGTGTGCTGATGTATCGGGAC   | CTTGCAGCCGTAGTGGACA     |
| PLIN-1           | TGTGCAATGCCTATGAGAAGG   | AGGGCGGGGATCTTTTCCT     |
| CEBPb            | GTTTCATGCAACGCCTGGTG    | CAGTCCGCCTCGTAGTAGAA    |
| CEBPa            | AGCCTTGTTTGTACTGTATG    | AAAATGGTGGTTTAGCAGAG    |
| FABP4            | ACTOGOCCAGGAATTIGACG    | CTCGTGGAAGTGACGCCTT     |
| ACLY             | ATCGGTTCAAGTATGCTCGGG   | GACCAAGTTTTCCACGACGTT   |
| ACACA            | ATGTTGGCTTGACACCTAGTA   | CCCCAAAGCGAGTAACAAATTCT |
| FASN             | TGGCTICATAGOTGACTTCCA   | AAGGACCTGTCTAGGTTTGATGC |
| HPRT1            | CCTGGCGTCGTGATTAGTGAT   | AGACG TTCAGTCCTGTCCATAA |
| B2M              | AAGGACTGGTCTTTCTATCTC   | GATCCCACTTA ACTATCTTGG  |

**Supplementary Table 7.** Correlation analysis of genes enriched in KEGG glycolysis geneset with *BCKDHA* as determined by gene vs genlist analysis in Correlation AnalyzerR.

| <b>Gene</b>  | <b>Correlation Value</b> | <b>p value</b> |
|--------------|--------------------------|----------------|
| <i>PFKL</i>  | 0.728                    | 1.72E-07       |
| <i>PIGQ</i>  | 0.685                    | 2.47E-07       |
| <i>ALDOA</i> | 0.649                    | 3.31E-07       |
| <i>HK2</i>   | 0.412                    | 2.22E-06       |
| <i>PGAM1</i> | 0.298                    | 6.75E-06       |
| <i>GAPDH</i> | 0.276                    | 8.67E-06       |
| <i>ENO1</i>  | 0.263                    | 1.01E-05       |
| <i>TPI1</i>  | 0.234                    | 1.47E-05       |
| <i>LDHA</i>  | 0.216                    | 1.89E-05       |
| <i>PGK1</i>  | 0.166                    | 4.29E-05       |
| <i>PKM</i>   | 0.0605                   | 0.0008971      |
| <i>PGM2</i>  | -0.148                   | 6.10E-05       |
