# Supplementary material for: Impaired branched-chain amino acid (BCAA) catabolism during adipocyte differentiation decreases glycolytic flux
Source: PubMed Central journal article supplement (PMC11667163; doi:10.1016/j.jbc.2024.108004), 2024-11-16

# Supplementary Figure 1

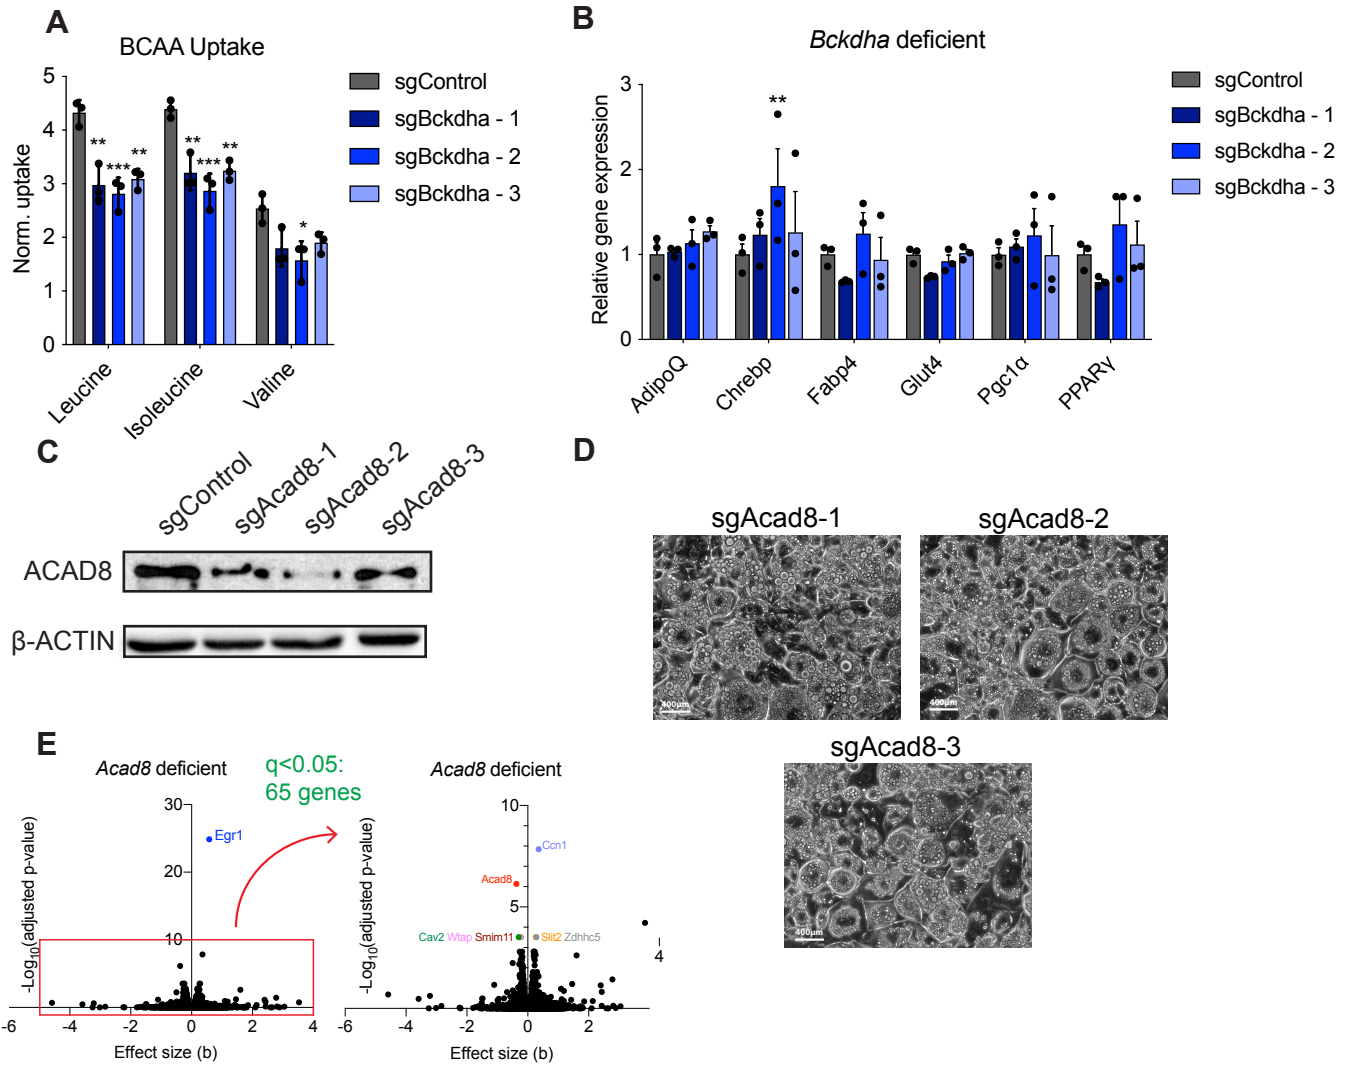

## Supplementary Figure 2

**A**

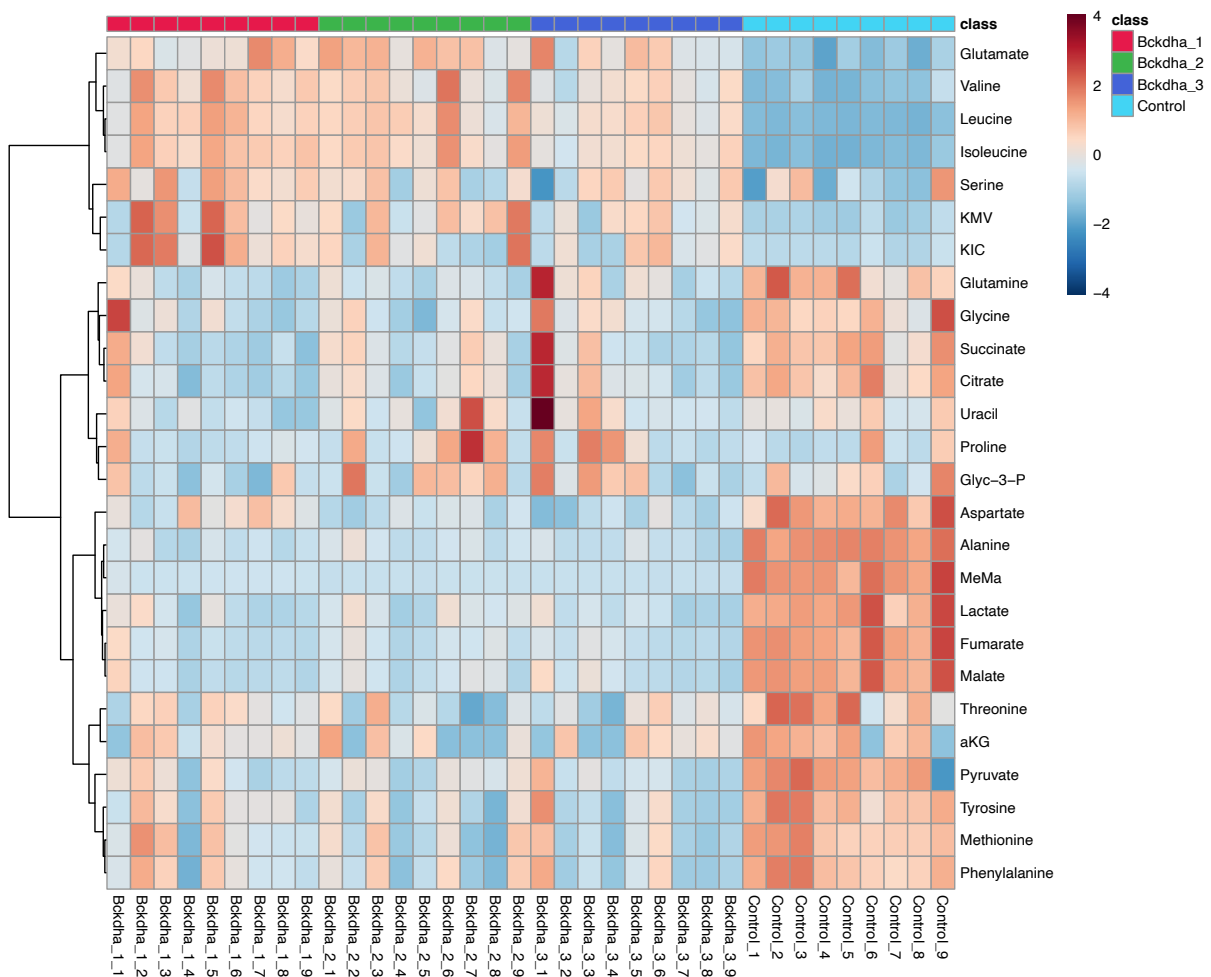

**B**

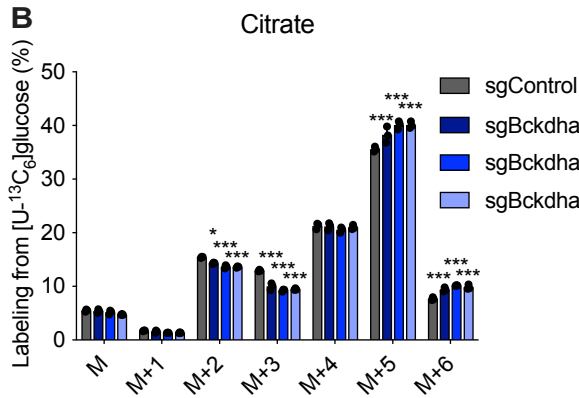

**C**

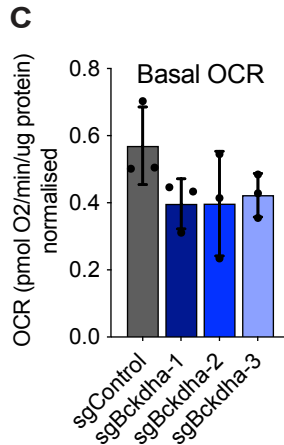

**D**

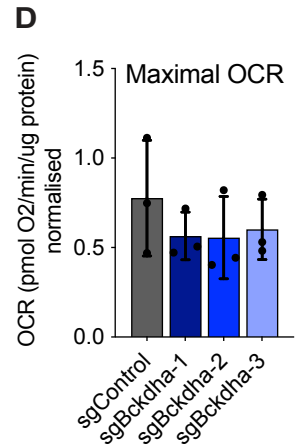

### Supplementary Figure 3

**A**

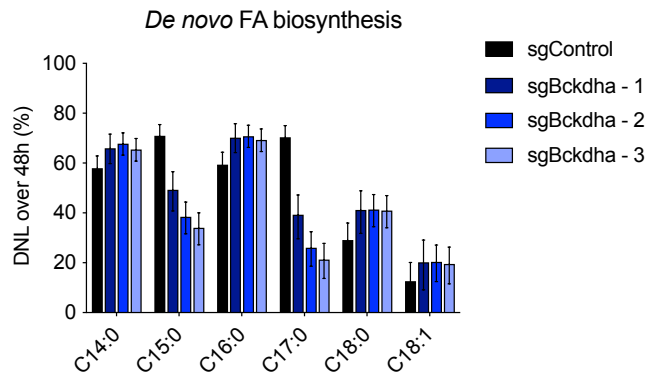

## Supplementary Figure 4

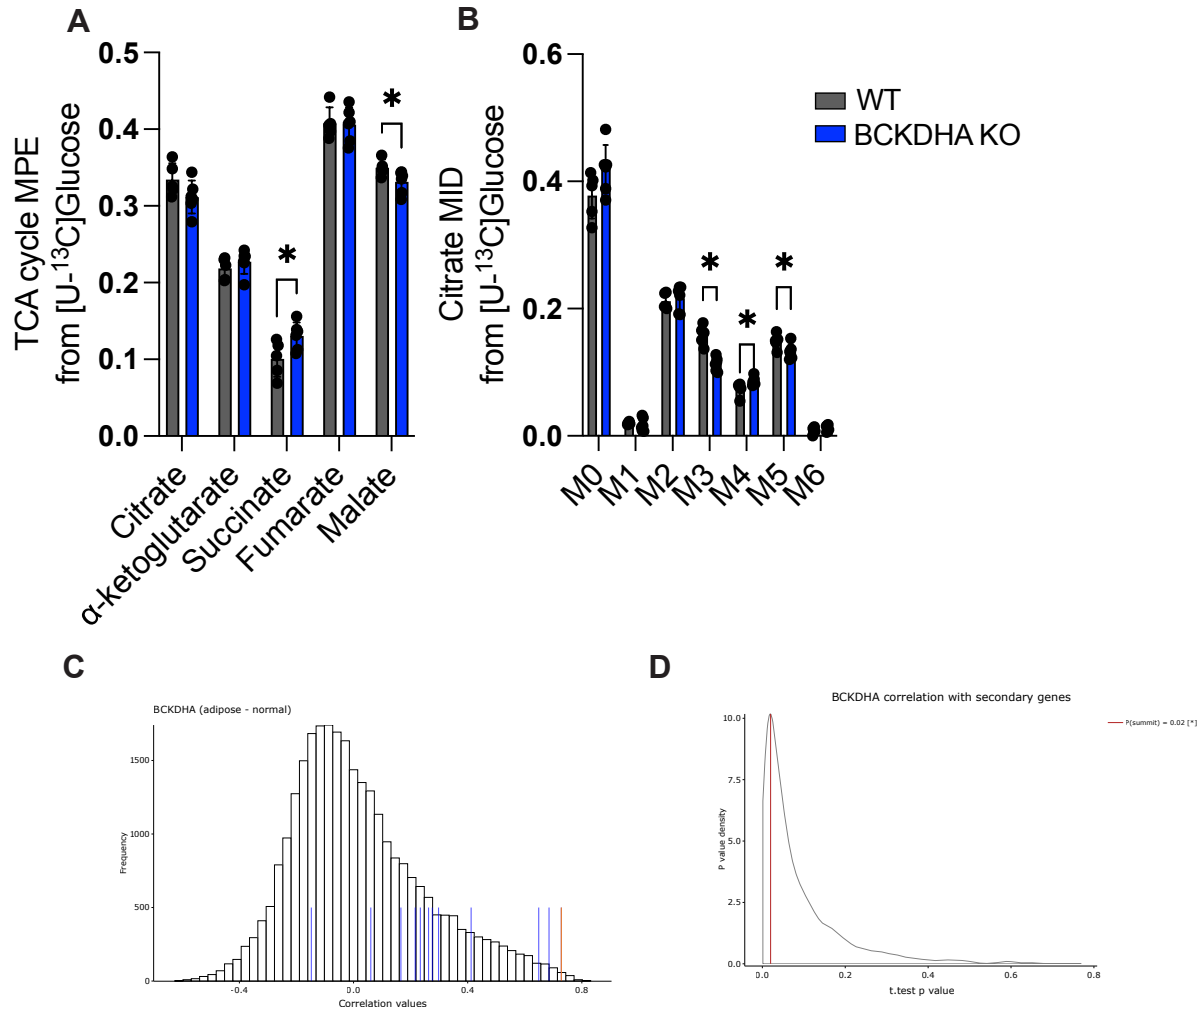

Supplement: mmc2.pdf [file mmc2.pdf]
